# Supplementary material for: Tumor regression in rectal cancer after intensified neoadjuvant chemoradiation: a morphometric and clinicopathological study
Source: Springer Nature journal article supplement (doi:10.1186/s12957-015-0572-z), 2015-04-20

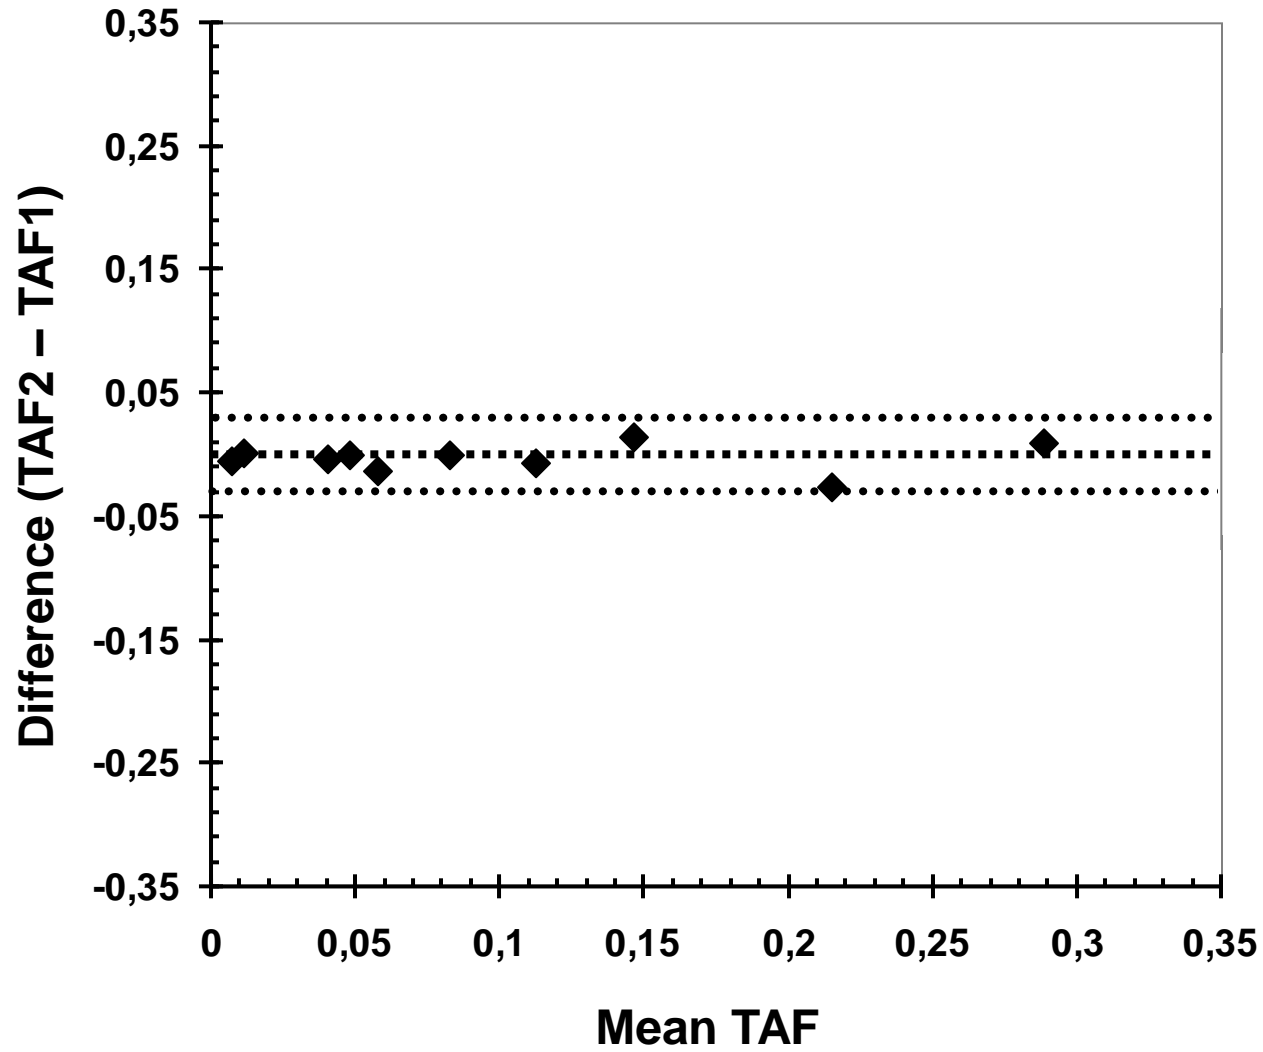

Supplement: MOESM2 [file 9764750]
